# Supplementary material for: Enantioselective chlorination and fluorination of β-keto phosphonates catalyzed by chiral Lewis acids
Source: Royal Society of Chemistry journal article supplement (doi:10.1039/b415568h), 2005-01-01
Supplement: b415568h.pdf [file b415568h.pdf]

## Electronic Supplementary Information

### **Enantioselective chlorination and fluorination of $\beta$ -keto phosphonates catalyzed by chiral Lewis acids**

Luca Bernardi and Karl Anker Jørgensen\*

The Danish National Research Foundation: Center for Catalysis, Department of Chemistry, Aarhus University, DK-8000 Aarhus C, Denmark, fax: (45) 8919 6199

e-mail: [kaj@chem.au.dk](mailto:kaj@chem.au.dk)

### **Experimental Section**

**General Methods.**  $^1\text{H}$ ,  $^{13}\text{C}$  and  $^{19}\text{F}$  NMR spectra were recorded on a Varian AS 400 spectrometer running at 400, 100 and 376 MHz, respectively, in  $\text{CDCl}_3$  as the solvent. Chemical shifts were reported in the  $\delta$  scale relative to residual  $\text{CHCl}_3$  (7.26 ppm) for  $^1\text{H}$  NMR, to the central line of  $\text{CDCl}_3$  (77.0 ppm) for  $^{13}\text{C}$  NMR and to  $\text{CFCl}_3$  (0 ppm), for  $^{19}\text{F}$  NMR.  $^{13}\text{C}$  NMR spectra were acquired on a broad band decoupled mode. Mass spectra were recorded on a micromass LCT spectrometer using electrospray ( $\text{ES}^+$ ) ionisation techniques. Flash column chromatography (FC) was carried out using the Merck silica gel 60 (230-400 mesh). Optical rotations were measured on a Perkin-Elmer 241 polarimeter. The enantiomeric excess (ee) of the products was determined by chiral stationary phase HPLC (Daicel Chiralpak AD or Daicel Chiralcel OJ columns) or by chiral stationary phase GC using a Chrompack CP-Chirasil-Dex CB column. Racemic samples were obtained using  $\text{Cu}(\text{OTf})_2$  as a catalyst.

**Materials.**  $\text{CH}_2\text{Cl}_2$  was distilled from  $\text{CaH}_2$  prior to use. All commercially available reagents were used as received.  $\beta$ -Keto phosphonates **1a,b,d,e**,  $^1\text{c}$ ,  $^2\text{f}$  were prepared according to literature procedures. (*R,R*)-4,6-dibenzofuranidyl-2,2'-bis(4-phenyloxazoline) (Ph-DBFOX) **4a** was prepared following a literature procedure.<sup>4</sup>

**General Procedure for the Catalytic Enantioselective Chlorination of  $\beta$ -Keto Phosphonates 1a-f:** In a flame dried Schlenk tube equipped with a magnetic stirring bar,  $\text{ZnI}_2$  (6.4 mg, 0.02 mmol) and (*R,R*)-4,6-dibenzofuranidyl-2,2'-bis(4-phenyloxazoline) **4a** (10.6 mg, 0.022 mmol) were added, followed by dry  $\text{CH}_2\text{Cl}_2$  (2 mL). The resulting clear, colourless solution was stirred under  $\text{N}_2$  for 1 h, then  $\text{AgSbF}_6$  (13.7 mg,

<sup>1</sup> I. Truel, A. Mohamed-Hachi, E. Aboud-Jaudet and N. Collignon, *Synth. Commun.*, 1997, **27**, 1165.

<sup>2</sup> R. D. Clark, L. G. Kozar and C. H. Heathcock, *Synthesis*, 1975, 635.

<sup>3</sup> T. Calogeropoulou, G. B. Hammond and D. F. Wiemer, *J. Org. Chem.*, 1987, **52**, 4185.

<sup>4</sup> U. Iserloh, D. P. Curran and S. Kanemasa, *Tetrahedron: Asymmetry*, 1999, **10**, 2417.

0.04 mmol) was added, and the resulting suspension was stirred in the dark for 6 h.  $\beta$ -Keto phosphonates **1a-f** (0.2 mmol) were then added, followed by *N*-chlorosuccinimide **2a** (29 mg, 0.22 mmol). After 20 h stirring in the dark at room temperature, the products **3a-f** were isolated by FC on silica gel ( $\text{CH}_2\text{Cl}_2/\text{Et}_2\text{O}$  mixtures).

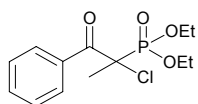

**(1-Chloro-1-methyl-2-oxo-2-phenyl-ethyl)-phosphonic acid diethyl ester (3a):**

Following the general procedure, compound **3a** was obtained as a colourless oil in 98% yield. The ee of the product was determined by HPLC using a Daicel Chiralpak AD column (*n*-hexane/*i*-PrOH = 90:10, flow rate 1.0 mL/min  $\tau_{\text{major}} = 6.1$  min;  $\tau_{\text{minor}} = 7.3$  min);  $^1\text{H}$  NMR  $\delta$  8.23-8.17 (m, 2H), 7.55-7.50 (m, 1H), 7.46-7.39 (m, 2H), 4.38-4.26 (m, 2H), 4.24-4.10 (m, 2H), 2.05 (d,  $J = 14.4$  Hz, 3H), 1.38 (t,  $J = 6.8$  Hz, 3H), 1.29 (t,  $J = 6.8$  Hz, 3H);  $^{13}\text{C}$  NMR  $\delta$  195.0, 135.2, 132.8, 130.3, 127.8, 67.3 (d,  $J = 150$  Hz), 64.8 (d,  $J = 6.9$  Hz), 64.3 (d,  $J = 6.8$  Hz), 26.1 (d,  $J = 3.1$  Hz), 16.5, 16.3; HRMS  $\text{C}_{13}\text{H}_{18}\text{ClO}_4\text{P} [\text{M} + \text{Na}^+]$  calculated: 327.0523, found: 327.0522;  $[\alpha]_{\text{D}}^{25} = +46$  ( $c = 0.87$ ,  $\text{CHCl}_3$ ), 92% ee.

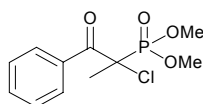

**(1-Chloro-1-methyl-2-oxo-2-phenyl-ethyl)-phosphonic acid dimethyl ester (3b):**

Following the general procedure, compound **3b** was obtained as a colourless oil in 97% yield. The ee of the product was determined by HPLC using a Daicel Chiralpak AD column (*n*-hexane/*i*-PrOH = 97:3, flow rate 1.0 mL/min  $\tau_{\text{major}} = 13.7$  min;  $\tau_{\text{minor}} = 14.9$  min);  $^1\text{H}$  NMR  $\delta$  8.20-8.14 (m, 2H), 7.58-7.50 (m, 1H), 7.48-7.39 (m, 2H), 3.95 (d,  $J = 10.8$  Hz, 3H), 3.84 (d,  $J = 10.8$  Hz, 3H), 2.07 (d,  $J = 14.8$  Hz);  $^{13}\text{C}$  NMR  $\delta$  194.8, 134.8, 133.0, 130.2, 127.9, 67.1 (d,  $J = 144.0$  Hz), 55.4 (d,  $J = 6.9$  Hz), 54.7 (d,  $J = 6.8$  Hz), 25.9 (d,  $J = 2.2$  Hz); HRMS  $\text{C}_{11}\text{H}_{14}\text{ClO}_4\text{P} [\text{M} + \text{Na}^+]$  calculated: 299.0210, found: 299.0205;  $[\alpha]_{\text{D}}^{25} = +20$  ( $c = 1.17$ ,  $\text{CHCl}_3$ ), 78% ee.

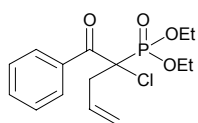

**(1-Benzoyl-1-chloro-but-3-enyl)-phosphonic acid diethyl ester (3c):**

Following the general procedure, compound **3c** was obtained as a colourless oil in 93% yield. The ee of the product was determined by HPLC using a Daicel Chiralpak AD column (*n*-hexane/*i*-PrOH = 90:10, flow rate 1.0 mL/min  $\tau_{\text{major}} = 9.4$  min;  $\tau_{\text{minor}} = 11.2$  min);  $^1\text{H}$  NMR  $\delta$  8.02-7.98 (m, 2H), 7.52-7.46 (m, 1H), 7.42-7.37 (ddt,  $J_{\text{d}} = 16.8, 10.0$  Hz,  $J_{\text{t}} = 6.8$  Hz, 2H), 5.74-5.62 (m, 1H), 5.20-5.12 (m, 2H), 4.41-4.28 (m, 2H), 4.26-4.14 (m, 2H), 3.55-3.46 (m, 1H), 2.90-2.79 (m, 1H), 1.38 (t,  $J = 7.2$  Hz, 3H), 1.33 (t,  $J = 7.2$  Hz, 3H);  $^{13}\text{C}$  NMR  $\delta$  196.5, 137.2, 132.5, 131.1, 129.7, 127.9, 120.9, 72.6 (d,  $J = 142.6$  Hz), 65.3 (d,  $J = 6.8$  Hz), 64.9 (d,  $J = 7.6$  Hz), 42.3 (d,  $J = 1.5$  Hz), 16.7, 16.6; HRMS  $\text{C}_{15}\text{H}_{20}\text{ClO}_4\text{P} [\text{M} + \text{Na}^+]$  calculated: 353.0680, found: 353.0680;  $[\alpha]_{\text{D}}^{25} = +36$  ( $c = 1.17$ ,  $\text{CHCl}_3$ ), 92% ee.

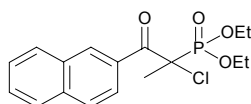

**(1-Chloro-1-methyl-2-naphthalen-2-yl-2-oxo-ethyl)-phosphonic acid diethyl ester (3d):** Following the general procedure, compound **3d** was obtained as a

colourless oil in 97% yield. The ee of the product was determined by HPLC using a Daicel Chiralpak AD column (*n*-hexane/*i*-PrOH = 90:10, flow rate 1.0 mL/min  $\tau_{\text{major}} = 7.1$  min;  $\tau_{\text{minor}} = 16.9$  min);  $^1\text{H NMR } \delta$  8.90 (br s, 1H), 8.17 (dd,  $J = 9.2, 1.8$  Hz, 1H), 7.97 (d,  $J = 8.4$  Hz, 1H), 7.85 (d,  $J = 8.4$  Hz, 1H), 7.85 (d,  $J = 8.4$  Hz, 1H), 7.61-7.40 (m, 2H), 4.41-4.26 (m, 2H), 4.25-4.12 (m, 2H), 2.11 (d,  $J = 14.4$  Hz, 3H), 1.39 (t,  $J = 6.8$  Hz, 3H), 1.30 (t,  $J = 6.8$  Hz, 3H);  $^{13}\text{C NMR } \delta$  194.6, 135.2, 132.5, 132.3, 131.9, 129.9, 128.6, 127.6, 127.4, 126.6, 125.8, 67.1 (d,  $J = 146$  Hz), 64.8 (d,  $J = 6.9$  Hz), 64.3 (d,  $J = 7.6$  Hz), 26.2 (d,  $J = 2.3$  Hz), 16.5, 16.3; HRMS  $\text{C}_{17}\text{H}_{20}\text{ClO}_4\text{P} [\text{M} + \text{Na}^+]$  calculated: 377.0680, found: 377.0681;  $[\alpha]_{\text{D}}^{25} = +27$  ( $c = 0.88$ ,  $\text{CHCl}_3$ ), 93% ee.

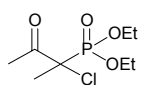

**(1-Chloro-1-methyl-2-oxo-propyl)-phosphonic acid diethyl ester (3e):** Following the general procedure, compound **3e** was obtained as a colourless oil in 80% yield. The ee of the product was determined by GC using a Chrompack CP-Chirasil-Dex CB column (70-110 °C (10 °C/min, 10 min) 110-140 °C (3°C/min)  $\tau_{\text{major}} = 18.4$  min;  $\tau_{\text{minor}} = 18.3$  min);  $^1\text{H NMR } \delta$  4.33-4.18 (m, 4H), 2.53 (s, 3H), 1.83 (d,  $J = 14.4$  Hz, 3H), 1.36 (t,  $J = 6.8$  Hz, 3H), 1.35 (t,  $J = 6.8$  Hz, 3H);  $^{13}\text{C NMR } \delta$  200.8, 68.3 (d,  $J = 144.2$  Hz), 64.7 (d,  $J = 9.1$  Hz), 64.5 (d,  $J = 6.8$  Hz), 27.1, 23.2 (d,  $J = 2.3$  Hz), 16.4, 16.3; HRMS  $\text{C}_8\text{H}_{16}\text{ClO}_4\text{P} [\text{M} + \text{Na}^+]$  calculated: 265.0367, found: 265.0365;  $[\alpha]_{\text{D}}^{25} = +30$  ( $c = 0.55$ ,  $\text{CHCl}_3$ ), 94% ee.

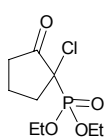

**(1-Chloro-2-oxo-cyclopentyl)-phosphonic acid diethyl ester (3f):** Following the general procedure, compound **3f** was obtained as a colourless oil in 40% yield. The ee of the product was determined by HPLC using a Daicel Chiralpak AD column (*n*-hexane/*i*-PrOH = 90:10, flow rate 1.0 mL/min  $\tau_{\text{major}} = 13.1$  min;  $\tau_{\text{minor}} = 11.1$  min);  $^1\text{H NMR } \delta$  4.35-4.17 (m, 4H), 2.87-2.74 (m, 1H), 2.55-2.28 (m, 3H), 2.21-2.07 (m, 2H), 1.38 (t,  $J = 6.8$  Hz, 3H), 1.36 (t,  $J = 6.8$  Hz, 3H);  $^{13}\text{C NMR } \delta$  207.6, 64.5 (d,  $J = 7.6$  Hz), 64.3 (d,  $J = 6.9$  Hz), 63.7 (d,  $J = 160$  Hz), 36.8, 36.5, 19.0, 16.4, 16.3; HRMS  $\text{C}_9\text{H}_{16}\text{ClO}_4\text{P} [\text{M} + \text{Na}^+]$  calculated: 277.0372, found: 277.0367;  $[\alpha]_{\text{D}}^{25} = -34$  ( $c = 0.27$ ,  $\text{CHCl}_3$ ), 80% ee.

**General Procedure for the Catalytic Enantioselective Fluorination of  $\beta$ -Keto Phosphonates 1a-d,f:** In a flame dried Schlenk tube equipped with a magnetic stirring bar and containing activated 4Å molecular sieves,  $\text{Zn}(\text{ClO}_4)_2 \cdot 6\text{H}_2\text{O}$  (7.4 mg, 0.02 mmol) and (*R,R*)-4,6-dibenzofuranidyl-2,2'-bis(4-phenyloxazoline) **4a** (10.6 mg, 0.022 mmol) were added, followed by dry  $\text{CH}_2\text{Cl}_2$  (1 mL). The resulting solution was stirred under  $\text{N}_2$  for 1 h, then  $\beta$ -keto phosphonates **1a-d,f** (0.1 mmol) were added, followed by *N*-fluorobenzenesulfonimide **2b** (95 mg, 0.3 mmol). After 60 h stirring at room temperature, the products **5a-d,f** were isolated by FC on silica gel ( $\text{CH}_2\text{Cl}_2/\text{Et}_2\text{O}$  mixtures).

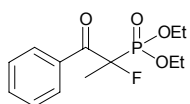

**(1-Fluoro-1-methyl-2-oxo-2-phenyl-ethyl)-phosphonic acid diethyl ester (5a):**

Following the general procedure, compound **5a** was obtained as a colourless oil in 59% yield. The ee of the product was determined by HPLC using a Daicel Chiralpak AD column (*n*-hexane/*i*-PrOH = 95:5, flow rate 1.0 mL/min  $\tau_{\text{major}} = 11.3$  min;  $\tau_{\text{minor}} = 12.5$  min);  $^1\text{H}$  NMR  $\delta$  8.10-8.04 (m, 2H), 7.60-7.54 (m, 1H), 7.49-7.41 (m, 2H), 4.34-4.18 (m, 4H), 1.92 (dd,  $J = 24.0, 15.2$  Hz, 3H), 1.35 (t,  $J = 7.2$  Hz, 3H), 1.33 (t,  $J = 7.2$  Hz, 3H);  $^{13}\text{C}$  NMR  $\delta$  197.6 (d,  $J = 26.6$  Hz), 134.7, 133.4, 130.0 (d,  $J = 7.6$  Hz), 128.2, 100.5 (dd,  $J = 194.2, 160.8$  Hz), 64.2 (d,  $J = 3.8$  Hz), 64.1 (d,  $J = 3.8$  Hz), 21.5 (d,  $J = 21.2$  Hz), 16.4. 16.3;  $^{19}\text{F}$  NMR  $\delta$  -166.2 (dq,  $J_{\text{d}} = 84.2$  Hz,  $J_{\text{q}} = 23.7$  Hz); HRMS  $\text{C}_{13}\text{H}_{18}\text{FO}_4\text{P}$  [ $\text{M} + \text{Na}^+$ ] calculated: 311.0819, found: 311.0834;  $[\alpha]_{\text{D}}^{25} = +23$  ( $c = 0.70$ ,  $\text{CHCl}_3$ ), 89% ee.

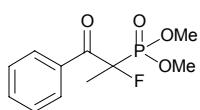

**(1-Fluoro-1-methyl-2-oxo-2-phenyl-ethyl)-phosphonic acid dimethyl ester (5b):**

Following the general procedure, compound **5b** was obtained as a colourless oil in 46% yield. The ee of the product was determined by HPLC using a Daicel Chiralcel OJ column (*n*-hexane/*i*-PrOH = 90:10, flow rate 1.0 mL/min  $\tau_{\text{major}} = 42.7$  min;  $\tau_{\text{minor}} = 34.9$  min);  $^1\text{H}$  NMR  $\delta$  8.09-8.04 (m, 2H), 7.62-7.55 (m, 1H), 7.49-7.43 (m, 2H), 3.90 (d,  $J = 4.8$  Hz, 3H), 3.87 (d,  $J = 4.8$  Hz, 3H), 1.93 (dd,  $J = 24.0, 15.2$  Hz, 3H);  $^{13}\text{C}$  NMR  $\delta$  197.4 (d,  $J = 22.7$  Hz), 134.4, 133.6, 129.9, 128.3, 100.5 (dd,  $J = 194.3, 162.4$  Hz), 54.6, 54.5, 21.6 (d,  $J = 22.0$  Hz);  $^{19}\text{F}$  NMR  $\delta$  -166.5 (dq,  $J_{\text{d}} = 85.7$  Hz,  $J_{\text{q}} = 25.2$  Hz); HRMS  $\text{C}_{11}\text{H}_{14}\text{FO}_4\text{P}$  [ $\text{M}^+$ ] calculated: 283.0506, found: 283.0510;  $[\alpha]_{\text{D}}^{25} = +19$  ( $c = 0.45$ ,  $\text{CHCl}_3$ ), 70% ee.

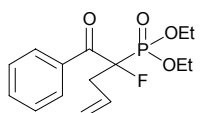

**(1-Benzoyl-1-fluoro-but-3-enyl)-phosphonic acid diethyl ester (5c):**

Following the general procedure, compound **5c** was obtained as a colourless oil in 41% yield. The ee of the product was determined by HPLC using a Daicel Chiralpak AD column (*n*-hexane/*i*-PrOH = 98:2, flow rate 1.0 mL/min  $\tau_{\text{major}} = 19.8$  min;  $\tau_{\text{minor}} = 21.4$  min);  $^1\text{H}$  NMR  $\delta$  8.02-7.94 (m, 2H), 7.59-7.52 (m, 1H), 7.47-7.39 (m, 2H), 5.80-5.66 (m, 1H), 5.24-5.10 (m, 2H), 4.33-4.18 (m, 4H), 3.32-3.11 (m, 1H), 3.04-2.86 (m, 1H), 1.35 (t,  $J = 6.8$  Hz, 3H), 1.33 (t,  $J = 6.8$  Hz, 3H);  $^{13}\text{C}$  NMR  $\delta$  197.8 (d,  $J = 26.5$  Hz), 133.1, 129.7, 129.6 (dd,  $J = 11.4, 3.8$  Hz), 128.1, 120.8, 102.4 (dd,  $J = 157.9, 199.6$  Hz), 64.3 (dd,  $J = 6.8, 9.1$  Hz), 39.2 (d,  $J = 20.5$  Hz), 16.4 (d,  $J = 5.3, 2.2$  Hz);  $^{19}\text{F}$  NMR  $\delta$  -175.9 (ddd,  $J = 82.7, 36.8, 11.6$  Hz); HRMS  $\text{C}_{15}\text{H}_{20}\text{FO}_4\text{P}$  [ $\text{M} + \text{Na}^+$ ] calculated: 337.0975, found: 337.0970;  $[\alpha]_{\text{D}}^{25} = +22$  ( $c = 0.35$ ,  $\text{CHCl}_3$ ), 91% ee.

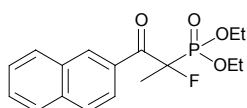

**(1-Fluoro-1-methyl-2-naphthalen-2-yl-2-oxo-ethyl)-phosphonic acid diethyl ester (5d):**

Following the general procedure, compound **5d** was obtained as a colourless oil in 71% yield. The ee of the product was determined by HPLC using a Daicel Chiralpak AD column (*n*-hexane/*i*-PrOH = 95:5, flow rate 1.0 mL/min  $\tau_{\text{major}} = 17.5$  min;  $\tau_{\text{minor}} = 28.4$  min);  $^1\text{H}$  NMR  $\delta$  8.73 (br s, 1H), 8.10-8.03 (m, 1H), 8.01-7.95 (m, 1H), 7.91-7.82 (m, 2H), 7.64-7.50 (m, 2H),

4.36-4.18 (m, 4H), 1.98 (dd,  $J = 24.0, 15.2$  Hz, 3H), 1.36 (t,  $J = 6.8$  Hz, 3H), 1.35 (t,  $J = 6.8$  Hz, 3H);  $^{13}\text{C}$  NMR  $\delta$  198.4 (d,  $J = 24$  Hz), 135.5, 132.6, 132.5, 132.2 (d,  $J = 1.4$  Hz), 103.0, 128.8, 127.9 (d,  $J = 1.5$  Hz), 127.6, 126.6, 125.3 (d,  $J = 4.6$  Hz), 99.2 (dd,  $J = 190.0, 160.9$  Hz), 64.2 (dd,  $J = 6.8, 5.4$  Hz), 21.7 (d,  $J = 22.0$  Hz), 16.4 (dd,  $J = 5.3, 1.0$  Hz);  $^{19}\text{F}$  NMR  $\delta$  -165.5 (dq,  $J = 84.3, 23.7$  Hz); HRMS  $\text{C}_{17}\text{H}_{20}\text{FO}_4\text{P}$  [ $\text{M} + \text{Na}^+$ ] calculated: 361.0975, found: 361.0979;  $[\alpha]_{\text{D}}^{\text{rt}} = -14$  ( $c = 0.75, \text{CHCl}_3$ ), 89% ee.

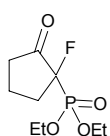

**(1-Fluoro-2-oxo-cyclopentyl)-phosphonic acid diethyl ester (5f):** Following the general procedure, compound **5f** as obtained as a colourless oil in 38% yield. The ee of the product was determined by HPLC using a Daicel Chiralpak AD column (*n*-hexane/*i*-PrOH = 95:5, flow rate 1.0 mL/min  $\tau_{\text{major}} = 11.8$  min;  $\tau_{\text{minor}} = 10.8$  min);  $^1\text{H}$  NMR  $\delta$  4.18-4.07 (m, 4H), 2.82-2.65 (m, 1H), 2.58-1.98 (m, 5H), 1.38 (t,  $J = 6.8$  Hz, 3H), 1.35 (t,  $J = 6.8$  Hz, 3H);  $^{13}\text{C}$  NMR  $\delta$  209.0 (d,  $J = 9.9$  Hz), 96.2 (dd,  $J = 199.6, 160.1$  Hz), 64.2 (d,  $J = 7.6$  Hz), 64.0 (d,  $J = 6.8$  Hz), 35.4 (d,  $J = 2.3$  Hz), 32.1, 31.9, 16.9, 16.3;  $^{19}\text{F}$  NMR  $\delta$  -174.5 (ddd,  $J = 84.2, 25.2, 10.5$  Hz); HRMS  $\text{C}_9\text{H}_{16}\text{FO}_4\text{P}$  [ $\text{M} + \text{Na}^+$ ] calculated: 261.0662, found: 261.0658;  $[\alpha]_{\text{D}}^{\text{rt}} = -125$  ( $c = 0.3, \text{CHCl}_3$ ), 91% ee.
